# Supplementary material for: Fluorescence turn-on detection of mercury ions based on the controlled adsorption of a perylene probe onto the gold nanoparticles
Source: Royal Society of Chemistry journal article supplement (doi:10.1039/c5an01992c), 2015-11-16
Supplement: c5an01992c1.pdf [file c5an01992c1.pdf]

## Supporting Information

# Fluorescence Turn-On Detection of Mercury Ions Based On the Controlled Adsorption of a Perylene Probe onto the Gold Nanoparticles

*Juanmin Li,<sup>ab</sup> Jian Chen,<sup>a</sup> Yang Chen,<sup>ab</sup> Yongxin Li,<sup>a</sup> Sohail Anjum Shahzad,<sup>ac</sup> Yan  
Wang,<sup>ab</sup> Meiding Yang<sup>ab</sup> and Cong Yu<sup>\*ab</sup>*

<sup>a</sup>State Key Laboratory of Electroanalytical Chemistry, Changchun Institute of Applied  
Chemistry, Chinese Academy of Sciences, Changchun 130022, P. R. China

<sup>b</sup>University of Chinese Academy of Sciences, Beijing 100049, P. R. China

<sup>c</sup>Department of Chemistry, COMSATS Institute of Information Technology, Abbottabad  
22060, Pakistan

Corresponding Author:

E-mail: [congyu@ciac.ac.cn](mailto:congyu@ciac.ac.cn)

Fax: (+86) 431-8526-2710

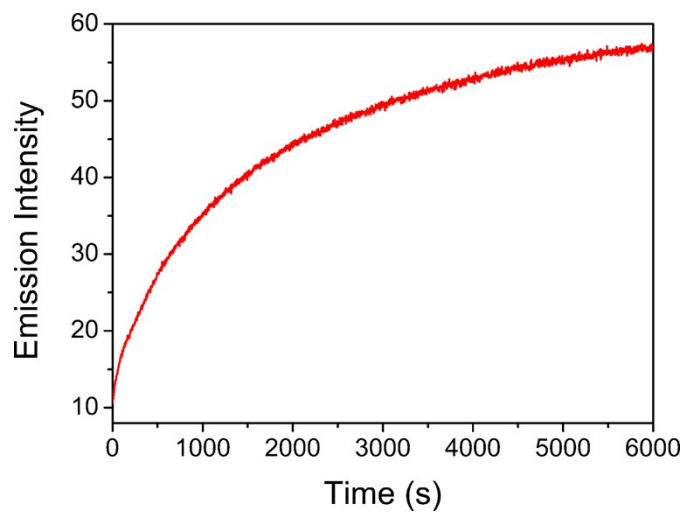

**Fig. S1** Emission intensity changes at 488 nm of the perylene probe as a function of reaction time. Final concentrations: phosphate buffer 20 mM (pH 7.0), Au NPs 1.3 nM, perylene probe 200 nM, NaBH<sub>4</sub> 100 μM, Hg<sup>2+</sup> 2.0 μM.

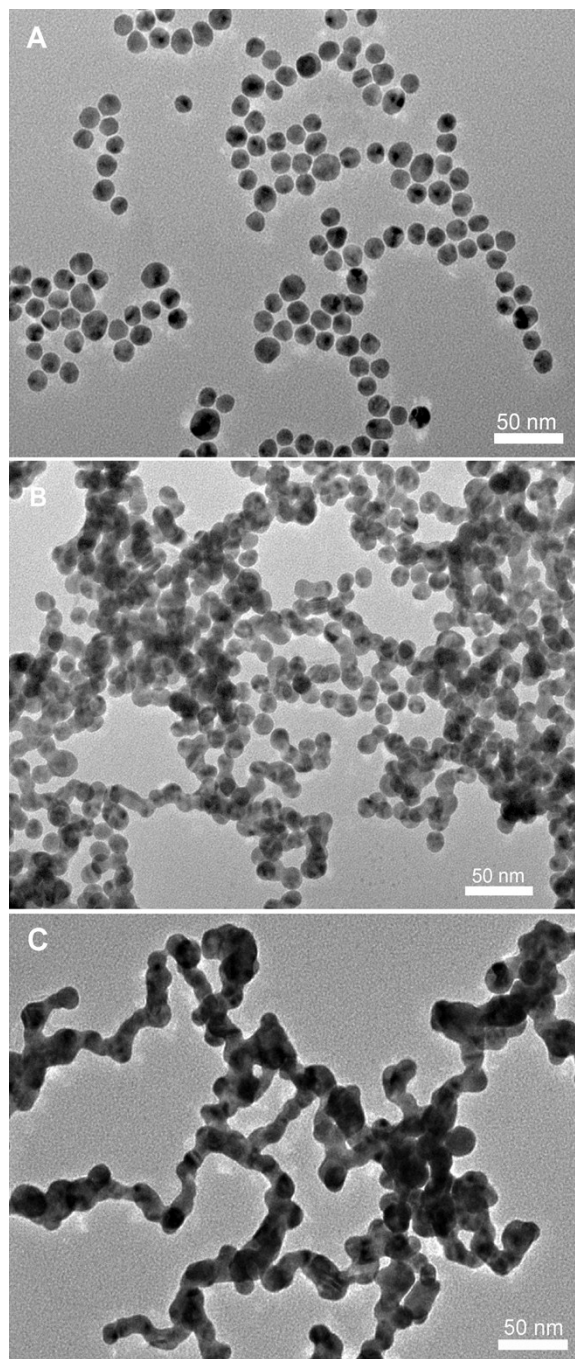

**Fig. S2** TEM images of the Au NPs (A) and the Au/Hg amalgam in the presence of  $\text{Hg}^{2+}$  of different concentrations [2.0  $\mu\text{M}$  (B), 4.0  $\mu\text{M}$  (C)]. Final concentrations: phosphate buffer 20 mM (pH 7.0), Au NPs 1.3 nM,  $\text{NaBH}_4$  100  $\mu\text{M}$ .



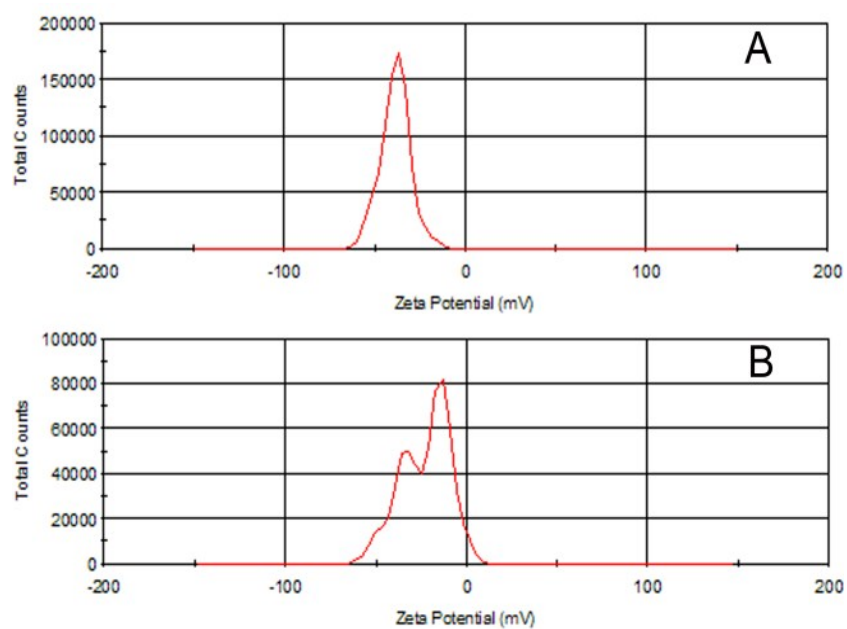

**Fig. S4** Zeta potential values of the Au NPs (A) and the Au/Hg amalgam (B). Final concentrations: phosphate buffer 20 mM (pH 7.0), Au NPs 1.3 nM, NaBH<sub>4</sub> 100 μM, Hg<sup>2+</sup> 2.0 μM.

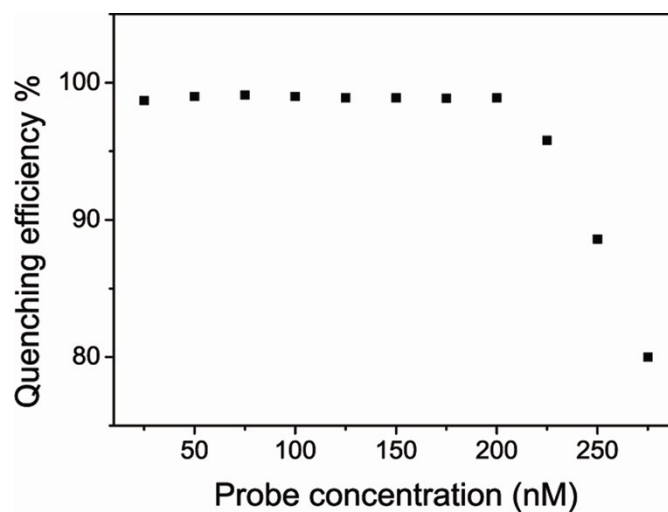

**Fig. S5** Changes in quenching efficiency with perylene probe concentration. Final concentrations: phosphate buffer 20 mM (pH 7.0), Au NPs 1.3 nM, perylene probe 25, 50, 75, 100, 125, 150, 175, 200, 225, 250 and 275 nM, respectively.

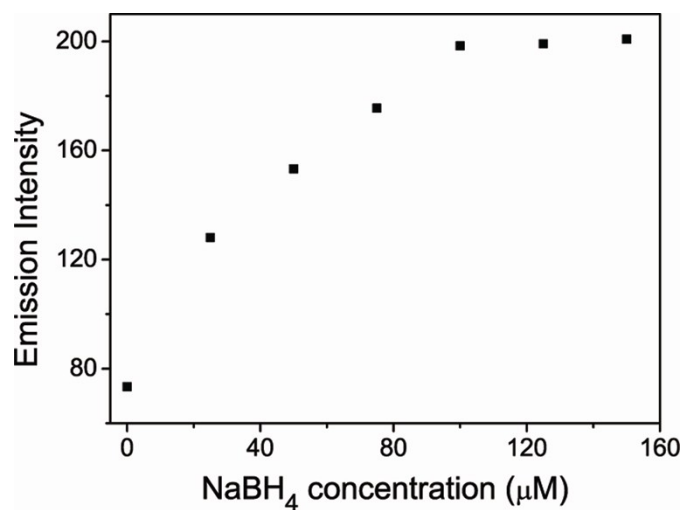

**Fig. S6** Changes in emission intensity of the perylene probe at 488 nm as a function of NaBH<sub>4</sub> concentration. Final concentrations: phosphate buffer 20 mM (pH 7.0), Au NPs 1.3 nM, Hg<sup>2+</sup> 2.0 μM, NaBH<sub>4</sub> 0, 25, 50, 75, 100, 125 and 150 μM, respectively.

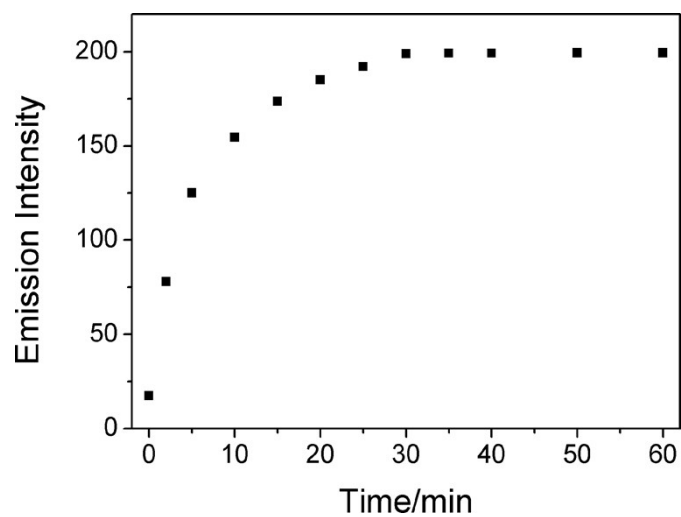

**Fig. S7** Changes in emission intensity of the perylene probe at 488 nm as a function of the reaction time. Final concentrations: phosphate buffer 20 mM (pH 7.0), Au NPs 1.3 nM, perylene probe 200 nM, NaBH<sub>4</sub> 100 μM, Hg<sup>2+</sup> 2.0 μM.



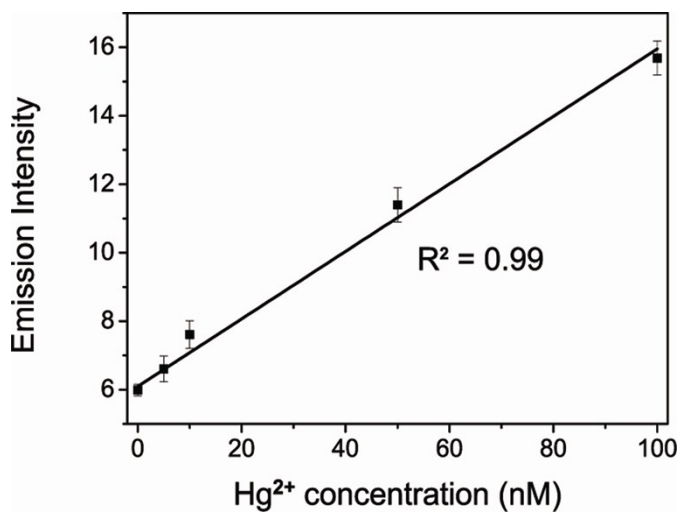

**Fig. S8** Plot of the changes in emission intensity of the perylene probe at 488 nm against  $\text{Hg}^{2+}$  of different concentrations (0 – 100 nM). Final concentrations: phosphate buffer 20 mM (pH 7.0), Au NPs 1.3 nM, perylene probe 200 nM,  $\text{NaBH}_4$  100  $\mu\text{M}$ .

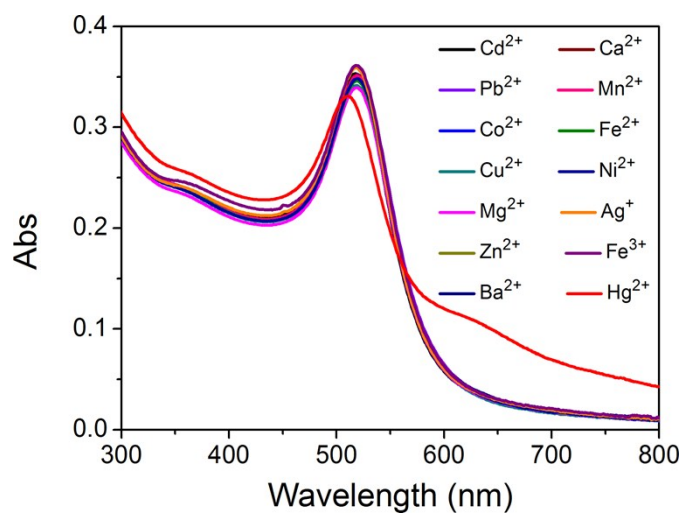

**Fig. S9** Changes in UV-vis absorption spectra of the Au NPs with the addition of NaBH<sub>4</sub> and different metal ions. Final concentrations: phosphate buffer 20 mM (pH 7.0), Au NPs 1.3 nM, NaBH<sub>4</sub> 100 μM, Hg<sup>2+</sup> and the other ions: 2.0 μM each.
